# Supplementary material
Source: publisher site journal article supplement (https://www.dovepress.com/article/507765)
Supplement: Supplementary file 1 [file get_supplementary_file.php]

## Supplementary Material

Table S1 Association of Dietary Inflammatory and TyG-BMI Index with Ferritin and TfR

| Metabolic indicators | Ferritin           |          | TfR              |          |
|----------------------|--------------------|----------|------------------|----------|
|                      | $\beta$ (95%CI)    | <i>P</i> | $\beta$ (95%CI)  | <i>P</i> |
| <b>Model1</b>        |                    |          |                  |          |
| DII                  | -0.25(-1.65, 1.16) | 0.731    | 1.29(1.14, 1.46) | <0.001   |
| TyG-BMI              | 0.17(0.11, 0.22)   | <0.001   | 0.36(0.23, 0.49) | <0.001   |
| <b>Model2</b>        |                    |          |                  |          |
| DII                  | 0.56(-0.83, 1.95)  | 0.432    | 1.18(1.04, 1.34) | 0.011    |
| TyG-BMI              | 0.11(0.05, 0.16)   | <0.001   | 0.23(0.10, 0.37) | <0.001   |
| <b>Model3</b>        |                    |          |                  |          |
| DII                  | 0.30(-1.10, 1.69)  | 0.677    | 1.17(1.03, 1.13) | 0.017    |
| TyG-BMI              | 0.09(0.03, 0.14)   | <0.001   | 0.22(0.09, 0.36) | <0.001   |

Data are expressed as coefficient  $\beta$  and 95%CI. Adjusted Model: Model 1 (unadjusted), Model 2 (adjusted for sex, age, and race), and Model 3 (further adjusted for gender, age, race, education, PIR, BMI, smoking, alcohol consumption, hypertension and diabetes). Bold indicates *P* value < 0.05.

Table S2 Optimal Cutpoint of DII and TyG-BMI index

| Variable | Cutpoint | Metric Score: | Sensitivity | Specificity | PPV   | NPV   | Accuracy | Precision | Recall |
|----------|----------|---------------|-------------|-------------|-------|-------|----------|-----------|--------|
|          |          | youden        |             |             |       |       |          |           |        |
| DII      | 1.88     | 0.151         | 50.4%       | 64.7%       | 19.1% | 88.7% | 62.7%    | 19.1%     | 50.4%  |
| TyG-BMI  | 263.06   | 0.132         | 42.3%       | 70.9%       | 19.4% | 88.1% | 66.9%    | 19.4%     | 42.3%  |

Metric Score: selected evaluation metric; Sensitivity: sensitivity; Specificity: Specificity; PPV:

Positive predictive value; NPV: negative predictive value; Accuracy: Accuracy; Precision:

precision; Recall: rate of recall.

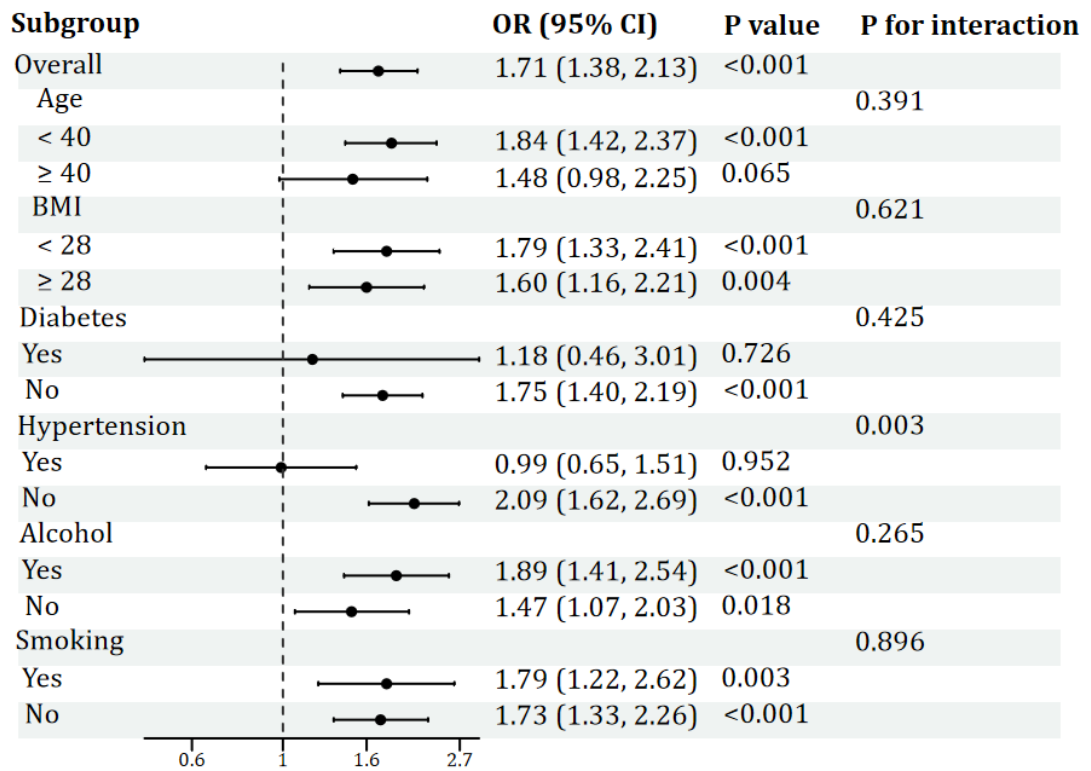

Figure. S1 Subgroups analyses for the association between DII and ID. Analyses were stratified for age ( $\leq 40$  years,  $\geq 40$  years), smoking status (smoker and non-smoker), alcohol consumption (drinker and non-drinker), diabetes (yes and no), and hypertension (yes and no).

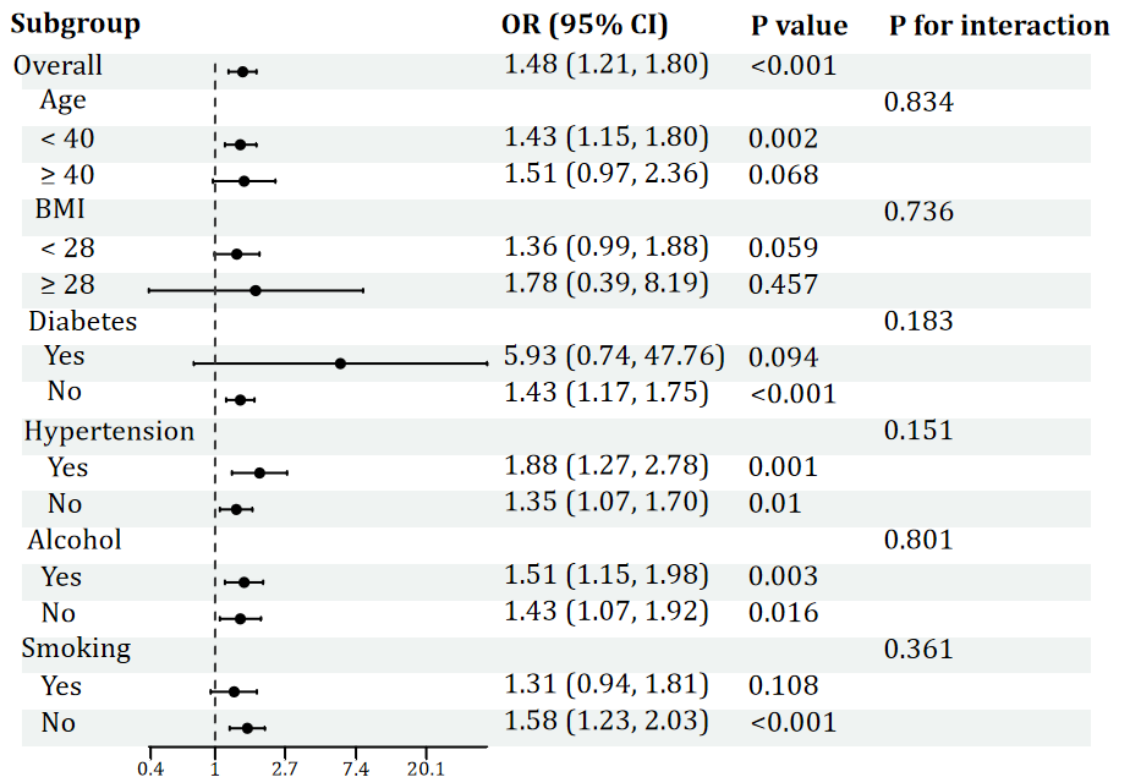

Figure. S2 Subgroups analyses for the association between TyG-BMI and ID. Analyses were stratified for age ( $\leq 40$  years,  $\geq 40$  years), smoking status (smoker and non-smoker), alcohol consumption (drinker and non-drinker), diabetes (yes and no), and hypertension (yes and no).
